# Supplementary material for: Cofactor Specificity of Glucose-6-Phosphate Dehydrogenase Isozymes in Pseudomonas putida Reveals a General Principle Underlying Glycolytic Strategies in Bacteria
Source: PubMed Central journal article supplement (PMC8546961; doi:10.1128/msystems.00014-21), 2021-03-16

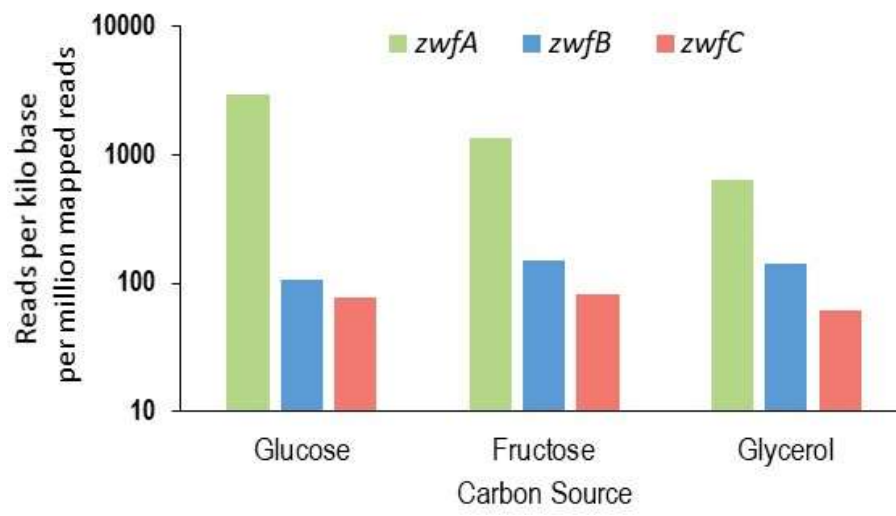

Supplement: msystems.00014-21-sf005.pdf [file msystems.00014-21-sf005.pdf]
