# Supplementary material for: Cofactor Specificity of Glucose-6-Phosphate Dehydrogenase Isozymes in Pseudomonas putida Reveals a General Principle Underlying Glycolytic Strategies in Bacteria
Source: PubMed Central journal article supplement (PMC8546961; doi:10.1128/msystems.00014-21), 2021-03-16
Supplement: msystems.00014-21-sf006.pdf [file msystems.00014-21-sf006.pdf]

|      |                                                                           |     |
|------|---------------------------------------------------------------------------|-----|
| zwfB | MTKQTLAAAPPCTFLFLFGANGDLVKRLLMPALYNLSRDGLLDRNLRIVGVDHNPASAEDF             | 60  |
| zwfA | ---MAAISVEPCTFALFGALGDLALRKLFPALYQLDRANLLHPDTRLLALAREVGSQAQEH             | 57  |
| zwfC | --VESGGLTIPCDILVFGGTGDLALHKLPLALYHLFREARLNPAVRVIALARRNLPRIDY              | 58  |
|      | : . ** : : ** . ** . : * : ** : * * * . * . * : : : . : .                 |     |
| zwfB | AARLHAFMVERDKGGEGSAKCLDEKLWARLAKRLDYQTGDFLDPATYQALARRIDKTRHG              | 120 |
| zwfA | LDSI-----EAHLRRHVPEADIEPAALGRFLARLNYQHLDLQPEGYQALAEQ--LPGEL               | 110 |
| zwfC | LKLA-----ERHCRAQIARSDFDEEVWQRF SARVDYFPMASQSADFRLRLARYLGEPPGL             | 113 |
|      | * . . : : * : * : * * : : : ** .                                          |     |
| zwfB | NAIFYLATSPPFFPEVAQRLLGQAGLLDESAGGFRRVWVEKPFGTDLASAEALNACLKVM              | 180 |
| zwfA | PLIAYFATAAAVYGAIENLDKVGGLAA-----RTRVLEKPIGHDLSSRRVNDAVARFF                | 165 |
| zwfC | TRIFYLATAPNLFVPIANHLRIAGLADT----EARIVLEKPIGHSLESATAINEAIGTVF              | 169 |
|      | * * : * : . : : : * . * * * : * : * : * : * * : * : * : . : .             |     |
| zwfB | GERQIYRIDHYLGKETVQNILVSRFSNGLFESFWNNHYIDHVQITAAETVGVETRGAFYD              | 240 |
| zwfA | PESRVYRIDHYLGKETVQNLIALRFANSLFETQWNQNSISHVEITVAEKVGIERWGYFD               | 225 |
| zwfC | EERQVFRIDHYLGKETVQNLMLRFANALLEPVWRNNQVDHVQISVCETLGVENRGAYYD               | 229 |
|      | * : : : * * * * * : : . * : * : * * * : : : . * : * : * : * * * * : : *   |     |
| zwfB | STGALRDMVPHLQQLLAMVAMEPPAAFADAVRGEKAKVVGAIKMAQKNSVRGQ                     | 300 |
| zwfA | KAGQLRDMIQNHLLQLLCLIAMDPPSELSADAIRDEKVKVLKALAPITGDGLSTSVVRGQ              | 285 |
| zwfC | RAGAIRDMLQNHLLQLLCLVAMEPPAQFEAEAVRDEKVKILRALKPITGDQVQDKTVRGG              | 289 |
|      | : * : * * : * * : * * : * * : * : * : * * : * : * : * : * : * : * : * : * |     |
| zwfB | YRAGKQGRKPLPGYRQEPNVAPDSQTETVYALKVMIDNWRWAGVPPFYLRTGKRMVSRDTE             | 360 |
| zwfA | YIAGYSEGKPVPGYL EEDNANAQSDTETFVALRADIRNWRWAGVPPFYLRTGKRMVSRDTE            | 345 |
| zwfC | YGAGRIGGQEVPAYYFEKDVDNDSDTETFVAIEAHIDNWRWAGVPPFYLRTGKRMARRASQ             | 349 |
|      | * * * : : * . * * : . : * : * * : * : . * * * * : * * * * * : : :         |     |
| zwfB | IAICFKPAPYAQFRESELERPKPNYLKIQIQPNEGMMFDLQAKRGPPE--LVMENVELGF              | 418 |
| zwfA | IVIHFKETPHYIFAPEQRL-QIGNKLIIRLQPDDEGISLRVMTKEQGLDKGMLRSGPLQL              | 404 |
| zwfC | IVIQFKPVPHELFSGGQV-----NQLLIQLQPDERISLRMMTKSPG--KGMRLPEVDL                | 402 |
|      | * * * * * : * : : * * * : * : * : * : * : * : * : * : * : * : * : *       |     |
| zwfB | AYKDFFKM-TPATGYETLIYDCLTGDQTLFQRADNIENGRVAVQPFLDAWAQGGE-VHEY              | 476 |
| zwfA | NFSDAWRSARIPDAYERLLL EVMRGNQNLVVRKDEIEYAWKWCQQLIAGWRNAGDAPKY              | 464 |
| zwfC | NLAQVFSQTRRWEAYERLLL DVLEGDSTLFMRRDEVEAAAWAVDPIIKGCEEHFQAPRPY             | 462 |
|      | : : . * * * : : : * : * * * * * : * : * : * : * : * : * : * : *           |     |
| zwfB | SAGEDGPEAGNELLTRDKREWHRLG*                                                | 501 |
| zwfA | AAGSWGPMSSIALITRDGRWYGDY*                                                 | 489 |
| zwfC | PAGSFGPEQANSLARHGRHWG*--                                                  | 485 |
|      | ** . ** . * : * . * * :                                                   |     |
