# Supplementary material for: Cofactor Specificity of Glucose-6-Phosphate Dehydrogenase Isozymes in Pseudomonas putida Reveals a General Principle Underlying Glycolytic Strategies in Bacteria
Source: PubMed Central journal article supplement (PMC8546961; doi:10.1128/msystems.00014-21), 2021-03-16
Supplement: msystems.00014-21-st001.pdf [file msystems.00014-21-st001.pdf]

**Table S1.** Bacterial strains and plasmids used in this study.<sup>a</sup>

| Name                                             | Relevant characteristics <sup>a</sup>                                                                                                                                                                                                                                     | Source or reference |
|--------------------------------------------------|---------------------------------------------------------------------------------------------------------------------------------------------------------------------------------------------------------------------------------------------------------------------------|---------------------|
| <b>Bacterial strain</b>                          |                                                                                                                                                                                                                                                                           |                     |
| <i>E. coli</i> DH5 $\alpha$                      | Cloning host; F <sup>-</sup> $\lambda^-$ <i>endA1 glnX44(AS) thiE1 recA1 relA1 spoT1 gyrA96(Nal<sup>R</sup>) rfbC1 deoR nupG</i> $\Phi$ 80( <i>lacZ</i> $\Delta$ M15) $\Delta$ ( <i>argF-lac</i> )U169 <i>hsdR17(r<sub>K</sub><sup>-</sup> m<sub>K</sub><sup>+</sup>)</i> | (1)                 |
| <i>E. coli</i> DH5 $\alpha$ $\lambda$ <i>pir</i> | Cloning host; $\lambda$ <i>pir</i> lysogen derivative of strain DH5 $\alpha$                                                                                                                                                                                              | (2)                 |
| <i>E. coli</i> BL21DE3                           | Expression host, <i>fhuA2 [lon] ompT gal</i> ( $\lambda$ <sub>DE3</sub> ) [ <i>dcm</i> ] $\Delta$ <i>hsdS</i> [ $\lambda$ <sub>DE3</sub> = $\lambda$ <i>sBamHlo</i> $\Delta$ <i>EcoRI-B</i> <i>int::(lacI::P<sub>lacUV5::T7 gene1</sub>) i21</i> $\Delta$ <i>nin5</i> ]   | New England Biolabs |
| <i>P. putida</i> KT2440                          | Wild-type strain; derivative of <i>P. putida</i> mt-2 (3) cured of the TOL plasmid pWW0                                                                                                                                                                                   | (4)                 |
| <b>Plasmid</b>                                   |                                                                                                                                                                                                                                                                           |                     |
| pEMG                                             | Suicide vector used for deletions in Gram-negative bacteria; <i>oriT</i> , <i>traJ</i> , <i>lacZ<math>\alpha</math></i> , <i>ori</i> (R6K); Km <sup>R</sup>                                                                                                               | (5)                 |
| pSEVA212s                                        | Suicide vector used for deletions in Gram-negative bacteria; <i>oriT</i> , <i>traJ</i> , <i>lacZ<math>\alpha</math></i> , <i>ori</i> (R6K); Km <sup>R</sup>                                                                                                               | (6)                 |
| pSEVA628s                                        | Helper plasmid; <i>oriV</i> (RK2), <i>XylS/Pm</i> $\rightarrow$ <i>I-SceI</i> ; Gm <sup>R</sup>                                                                                                                                                                           | (7)                 |
| pS212s $\cdot\Delta$ <i>zwfA</i>                 | Derivative of vector pEMG, carrying HRs to delete <i>zwfA</i> (PP_1022)                                                                                                                                                                                                   | This work           |
| pEMG $\cdot\Delta$ <i>zwfB</i>                   | Derivative of vector pEMG, carrying HRs to delete <i>zwfB</i> (PP_4042)                                                                                                                                                                                                   | This work           |
| pEMG $\cdot\Delta$ <i>zwf</i>                    | Derivative of vector pEMG, carrying HRs to delete <i>zwf</i> (PP_5351)                                                                                                                                                                                                    | This work           |
| pEMG $\cdot\Delta$ <i>hexR</i>                   | Derivative of vector pEMG, carrying HRs to delete <i>hexR</i> (PP_1021)                                                                                                                                                                                                   | This work           |
| pEMG $\cdot\Delta$ <i>rpiR</i>                   | Derivative of vector pEMG, carrying HRs to delete <i>rpiR</i> (PP_5350)                                                                                                                                                                                                   | This work           |
| pSEVA227Y                                        | Cloning vector; <i>oriV</i> (RK2), promoter-less <i>yfp</i> ; Km <sup>R</sup>                                                                                                                                                                                             | (8)                 |
| pS22T $\cdot$ P <sub><i>zwfA</i></sub>           | Derivative of vector pS227Y with 302-bp-long genomic region upstream of <i>zwfA</i>                                                                                                                                                                                       | This work           |
| pS22T $\cdot$ P <sub><i>zwfC</i></sub>           | Derivative of vector pS227Y with 278-bp-long genomic region upstream of <i>zwf</i>                                                                                                                                                                                        | This work           |
| pET28a                                           | Expression vector, <i>oriV</i> (pBR322), P <sub>T7</sub> , Km <sup>R</sup>                                                                                                                                                                                                | Novagen             |
| pET28a:: <i>Zwf</i>                              | Derivative of vector pET28a, P <sub>T7</sub> $\rightarrow$ <i>zwf</i>                                                                                                                                                                                                     | This work           |
| pET28a:: <i>ZwfB</i>                             | Derivative of vector pET28a, P <sub>T7</sub> $\rightarrow$ <i>zwfB</i>                                                                                                                                                                                                    | This work           |

<sup>a</sup> Antibiotic markers: Gm, gentamicin; Km, kanamycin; Nal, nalidixic acid; and Str, streptomycin.

## REFERENCES

1. **Meselson M, Yuan R.** 1968. DNA restriction enzyme from *E. coli*. *Nature* **217**:1110-1114. <http://dx.doi.org/10.1038/2171110a0>
2. **Platt R, Drescher C, Park SK, Phillips GJ.** 2000. Genetic system for reversible integration of DNA constructs and *lacZ* gene fusions into the *Escherichia coli* chromosome. *Plasmid* **43**:12-23. <http://dx.doi.org/https://doi.org/10.1006/plas.1999.1433>
3. **Worsey MJ, Williams PA.** 1975. Metabolism of toluene and xylenes by *Pseudomonas putida* (*arvilla*) mt-2: evidence for a new function of the TOL plasmid. *J. Bacteriol.* **124**:7-13.
4. **Bagdasarian M, Lurz R, Rückert B, Franklin FCH, Bagdasarian MM, Frey J, Timmis KN.** 1981. Specific purpose plasmid cloning vectors. II. Broad host range, high copy number, RSF1010-derived vectors, and a host-vector system for gene cloning in *Pseudomonas*. *Gene* **16**:237-247. [http://dx.doi.org/10.1016/0378-1119\(81\)90080-9](http://dx.doi.org/10.1016/0378-1119(81)90080-9)
5. **Martínez-García E, de Lorenzo V.** 2011. Engineering multiple genomic deletions in Gram-negative bacteria: analysis of the multi-resistant antibiotic profile of *Pseudomonas putida* KT2440. *Environ. Microbiol.* **13**:2702-2716. <http://dx.doi.org/10.1111/j.1462-2920.2011.02538.x>
6. **Silva-Rocha R, Martínez-García E, Calles B, Chavarría M, Arce-Rodríguez A, de las Heras A, Páez-Espino AD, Durante-Rodríguez G, Kim J, Nikel PI, Platero R, de Lorenzo V.** 2013. The Standard European Vector Architecture (SEVA): a coherent platform for the analysis and deployment of complex prokaryotic phenotypes. *Nucleic Acids Res.* **41**:D666-D675. <http://dx.doi.org/10.1093/nar/gks1119>
7. **Aparicio T, Jensen SI, Nielsen AT, de Lorenzo V, Martínez-García E.** 2016. The Ssr protein (*T1E\_1405*) from *Pseudomonas putida* DOT-T1E enables oligonucleotide-based recombineering in platform strain *P. putida* EM42. *Biotechnol. J.* **11**:1309-1319. <http://dx.doi.org/10.1002/biot.201600317>
8. **Martínez-García E, Aparicio T, Goñi-Moreno A, Fraile S, de Lorenzo V.** 2015. SEVA 2.0: an update of the Standard European Vector Architecture for de-/re-construction of bacterial functionalities. *Nucleic Acids Res.* **43**:D1183-D1189. <http://dx.doi.org/10.1093/nar/gku1114>
