# Supplementary material for: Cofactor Specificity of Glucose-6-Phosphate Dehydrogenase Isozymes in Pseudomonas putida Reveals a General Principle Underlying Glycolytic Strategies in Bacteria
Source: PubMed Central journal article supplement (PMC8546961; doi:10.1128/msystems.00014-21), 2021-03-16
Supplement: msystems.00014-21-st002.pdf [file msystems.00014-21-st002.pdf]

**Table S2.** Oligonucleotides used in this study.<sup>a</sup>

| Oligonucleotide            | Sequence (5'→3')                                                                 | Use                                                                     |
|----------------------------|----------------------------------------------------------------------------------|-------------------------------------------------------------------------|
| P <sub>ZwfA</sub> _EcoRI-F | GCG CGA ATT CGC GGG TTG AGC AGG ATG ACT T                                        | Amplification of promoter region upstream of <i>zwfA</i> and <i>zwf</i> |
| P <sub>ZwfA</sub> _BamHI-R | TAG AGG ATC CGA TGT TGG TTC TTT CCT AAA GTT GGT CT                               |                                                                         |
| P <sub>Zwf</sub> _EcoRI-F  | GCG CGA ATT CGG AAG CCC GAG CAG CCA AT                                           |                                                                         |
| P <sub>Zwf</sub> _BamHI-R  | AGA GGA TCC GTT CGT TTA ACT GGG CGG GTT G                                        |                                                                         |
| ZwfC_US-HindIII-F          | AAA AAG CTT CGC CAA AGC CAT AGA ACT CTA CCC                                      | Deletion of <i>zwf</i> (PP_5351)                                        |
| ZwfC_US-R                  | GAT TAA AGA TCG CGC CAT CGC GCA GGC CAT GTT CGT TTA<br>ACT GGG CGG GTT GG        |                                                                         |
| ZwfC_DS-F                  | ATG GAC GCC AAC CCG CCC AGT TAA ACG AAC ATG GCC<br>TGC GCG ATG GC                |                                                                         |
| ZwfC_DS-BamHI-R            | AAA GGA TCC GGC CGT GGA AGG TGC CTA CC                                           |                                                                         |
| ZwfA_US-BamHI-F            | AAA GGA TCC GCA GGC AGC GGC GTG G                                                | Deletion of <i>zwfA</i> (PP_1022)                                       |
| ZwfA_US-R                  | CCT AGA CCA ACT TTA GGA AAG AAC CAA CAT CTG GGG<br>GCC GAT GAG CTC GA            |                                                                         |
| ZwfA_DS-F                  | GAT CAG TGC AAT CGA GCT CAT CGG CCC CCA GAT GTT<br>GGT TCT TTC CTA AAG TTG GTC T |                                                                         |
| ZwfA_DS-HindIII-R          | AAA AAG CTT GGG TGT AGG CGG CCG G                                                |                                                                         |
| ZwfB_US-BamHI-F            | AAA GGA TCC CCG GTC AGG GCC GGC GA                                               | Deletion of <i>zwfB</i> (PP_4042)                                       |
| ZwfB_US-R                  | GGT GGC CAC GTC GAG AAG AAA GGC GAA TGA GAG GTT<br>TGC AAG CCT GTG CCG           |                                                                         |
| ZwfB_DS-F                  | CGA AAG GGC CGG CAC AGG CTT GCA AAC CTC TCA TTC<br>GCC TTT CTT CTC GAC GTG       |                                                                         |
| ZwfB_DS-SalI-R             | AAA GTC GAC CGT ACC CAT GGC CGC AGC                                              |                                                                         |
| ZwfB_NdeI-F                | CTT ATC CAT ATG ACT AAA CAG ACC CTT GCG                                          | Amplification of <i>zwfB</i>                                            |
| ZwfB_BamHI-R               | CTG ATT GGA TCC TCA CCC CAA CCG GTG CCA CTC C                                    |                                                                         |
| Zwf_NdeI-F                 | CTT ATC CAT ATG GAG AGT GGT GGT TTG ACT ATT CC                                   | Amplification of <i>zwf</i>                                             |
| Zwf_BamHI-R                | CAA TAT GGA TCC TCA GCC ATG CCA GTG CCT GCC ATG                                  |                                                                         |
| <i>hexR</i> _US-BamHI-F    | AAG GAT CCG CTC GCC CGG CAG CTG CTC                                              | Deletion of <i>hexR</i> (PP_1021)                                       |
| <i>hexR</i> _US-R          | CTC AGT TGA GGT CGT CCA CGC GGT CCA TGG GTG TGT C                                |                                                                         |

|                                      |                                                       |                                      |
|--------------------------------------|-------------------------------------------------------|--------------------------------------|
| <i>hexR</i> _DS-F                    | CCC ATG GAC CGC GTG GAC GAC CTC AAC TGA GCC GGT<br>GC | Deletion of <i>hexR</i><br>(PP_1021) |
| <i>hexR</i> _DS-EcoRI-R              | AAG AAT TCG CGG CTG GAC CTG TGC GAC TGG               |                                      |
| <i>rpiR</i> _US-BamHI-F <sup>†</sup> | AGA TCC UGT CCG GCA ATG CGC AGG T                     | Deletion of <i>rpiR</i><br>(PP_5350) |
| <i>rpiR</i> _US-R <sup>†</sup>       | AGG TTG AAU AGG CGG GAC TCG GTT ATG AT                |                                      |
| <i>rpiR</i> _DS-F <sup>†</sup>       | AGG TCG ACU CCA AGG CCA AGC GGC AGT CA                |                                      |
| <i>rpiR</i> _DS-Sall-R <sup>†</sup>  | ATT CAA CCU GTA CTG GCC TGT TCG CGG GC                |                                      |

<sup>a</sup> Oligonucleotides designed for *USER* cloning are indicated with a † symbol.
